# Supplementary material for: Redefining the expressed prototype SICAvar gene involved in Plasmodium knowlesi antigenic variation
Source: PubMed Central journal article supplement (PMC3152765; doi:10.1186/1475-2875-8-181), 2009-07-31
Supplement: 1475-2875-8-181-S3.pdf [file 1475-2875-8-181-S3.pdf]

**PKH\_051981**

---

K.TAQAAQLVQSAGGGTK.E

K.YLKENADSLASFVK.V

R.YFTAGVGTTTGK.K

**PKH\_052810**

---

K.VDALAQQAQGSGK.N

R.TACELVAGLLR.I

K.WIFGGLLDR.M

**PKH\_114570, PKH\_052840, and PKH\_040710**

---

K.GPSFEQTMGCLFLK.E

R.KACNHIAAGLK.Y
